# Supplementary material for: A Potential Therapy Using Antisense Oligonucleotides to Treat Autosomal Recessive Polycystic Kidney Disease
Source: MDPI journal article supplement (doi:10.3390/jcm12041428), 2023-02-10
Supplement: s1 [file s1]

**Table S2. *PKHD1* primers for minigene construct**

| <b>Exon</b>       | <b>Primers(5'-3')</b>                            |
|-------------------|--------------------------------------------------|
| <b>Exon61- F1</b> | accagaattctggagctcgagCACTCTCAGTATCTGGCACAATTAGA  |
| <b>Exon61- R1</b> | atcaccagatatctgggatccTCTTCCTACATGCTTTTCACCTTAAG  |
| <b>Exon61- F2</b> | accagaattctggagctcgagCAATCTTCCTTGCACTCTCAGTATCT  |
| <b>Exon61- R2</b> | atcaccagatatctgggatccCATGCTTTTCACCTTAAGGAATCA    |
| <b>Exon61- F3</b> | accagaattctggagctcgagCCAGTTATAGATGATGGCAAGAGTG   |
| <b>Exon61- R3</b> | atcaccagatatctgggatccCCACCTTGGAATAGAATAATCATGA   |
| <b>Exon22- F1</b> | accagaattctggagctcgagACTGAATGGCTTATCCTCCTGC      |
| <b>Exon22- R1</b> | atcaccagatatctgggatccGTGAATCTGGTGCTGCATTCTCA     |
| <b>Exon22- F2</b> | accagaattctggagctcgagGGCAGCAGATAAGTAGGAATCTATGC  |
| <b>Exon22- R2</b> | atcaccagatatctgggatccGAAACTCTGACAGTAGGCCAGTAA    |
| <b>Exon22- F3</b> | accagaattctggagctcgagACTAAGCTCTCCTTGTCAGATTGATTG |
| <b>Exon22- R3</b> | atcaccagatatctgggatccCTGACTCGGAATTAGTTCTCAAAGC   |
| <b>Exon47- F1</b> | accagaattctggagctcgagGGTCCTTTGTCATATGTGTGATTGG   |
| <b>Exon47- R1</b> | atcaccagatatctgggatccGAATGTGATAGGCACCATAATAGGAG  |
| <b>Exon47- F2</b> | accagaattctggagctcgagTCTCTTAGTCAATAGCTCGCTTTTTT  |
| <b>Exon47- R2</b> | atcaccagatatctgggatccGCAACAGTTTCTACTGATGCAATCT   |
