# Supplementary material for: A Potential Therapy Using Antisense Oligonucleotides to Treat Autosomal Recessive Polycystic Kidney Disease
Source: MDPI journal article supplement (doi:10.3390/jcm12041428), 2023-02-10
Supplement: s1 [file s1]

**Figure S4**

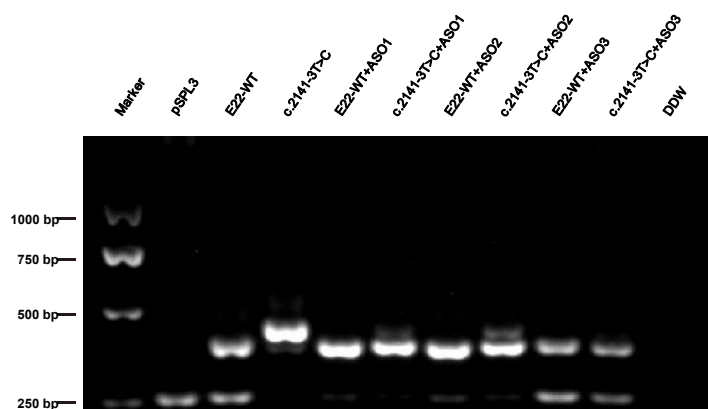

Figure S4. Antisense oligonucleotides (ASOs) rescue the c.2141-3T>C variant of the *PKHD1* gene, which causes aberrant splicing in HEK293T cells. Analysis of splicing correction by RT-PCR upon ASOs treatments. The wild-type (WT) minigene and the corresponding mutant (MU) minigene containing the variant c.2141-3T>C were transfected into HEK293T cells. The three ASOs were then delivered except in the nontreated lanes. The exon elongation caused by c.2141-3T>C was efficiently rescued by ASO1, ASO2 and ASO3.
