# Supplementary material for: A Potential Therapy Using Antisense Oligonucleotides to Treat Autosomal Recessive Polycystic Kidney Disease
Source: MDPI journal article supplement (doi:10.3390/jcm12041428), 2023-02-10
Supplement: s1 [file s1]

**Table S4. Prediction of three splice site variants of *PKHD1*.**

| Exon | Nucleotide Change | The Human Splicing Finder                                           | SpliceAI                 | MaxEntScan         |
|------|-------------------|---------------------------------------------------------------------|--------------------------|--------------------|
| 22   | c.2141-3T>C       | NO significant impact on splicing signals                           | Get new WT Acceptor site | cut-off < 3.0      |
| 47   | c.7351-2A>T       | broken WT Acceptor site<br>decreasing the score from 86.45 to 58.58 | broken WT Acceptor site  | cut-off $\geq$ 3.0 |
| 61   | c.11174+5G>A      | broken WT Donor site<br>decreasing the score from 92.39 to 82.83    | broken WT Donor site     | cut-off $\geq$ 3.0 |
