# Supplementary material for: A Potential Therapy Using Antisense Oligonucleotides to Treat Autosomal Recessive Polycystic Kidney Disease
Source: MDPI journal article supplement (doi:10.3390/jcm12041428), 2023-02-10
Supplement: s1 [file s1]

**Table S3. Prediction of nine missense variants of *PKHD1*.**

| Exon | Nucleotide Change | Amino Acid Change | PolyPhen-2 | PROVEAN              | SIFT                            | Mutation Taster | ACMG                 |
|------|-------------------|-------------------|------------|----------------------|---------------------------------|-----------------|----------------------|
| 5    | c.325G>A          | Ala109Thr         | P (0.156)  | Neutral (-0.075)     | Tolerated (0.13)                | D (0.99)        | LP (PS2+PM2)         |
| 24   | c.2507T>C         | Val836Ala         | D (0.991)  | Deleterious (-2.973) | Affect protein function (0.000) | N (0.67)        | VUS (PM2+PP3+PM3)    |
| 30   | c.3500T>C         | Leu1167Pro        | B (0.214)  | Deleterious (-4.590) | Affect protein function (0.000) | N (0.99)        | VUS (PM2+PP3)        |
| 32   | c.4199C>T         | Ser1400Leu        | P (0.634)  | Deleterious (-4.938) | Affect protein function (0.000) | D (0.90)        | VUS (PM2+PP3)        |
| 36   | c.5869G>A         | Asp1957Asn        | P (0.733)  | Deleterious (-3.664) | Affect protein function (0.040) | D (0.96)        | LP (PS2+PM2+PP3)     |
| 38   | c.6245C>T         | Thr2082Ile        | B (0.001)  | Deleterious (-3.091) | Affect protein function (0.02)  | D (0.99)        | VUS (PM2+PP3)        |
| 50   | c.7942G>A         | Gly2648Ser        | D (1.000)  | Neutral (-2.147)     | Tolerated (0.35)                | D (0.84)        | VUS (PM2)            |
| 54   | c.8518C>T         | Arg2840Cys        | D (0.999)  | Deleterious (-3.263) | Tolerated (0.06)                | D (0.61)        | LP (PS1+PM2+PM3+PP3) |
| 60   | c.10072G>A        | Asp3358Asn        | D (1.000)  | Deleterious (-4.148) | Affect protein function (0.000) | D (0.97)        | LP (PS2+PM2+PM3+PP3) |
| 65   | c.11525G>A        | Arg3842Gln        | D (1.000)  | Neutral (-0.972)     | Affect protein function (0.000) | N (0.95)        | VUS (PM2+PP3)        |

PolyPhen-2 prediction score, D: Probably damaging ( $\geq 0.909$ ), P: Possibly damaging ( $0.447 \leq P < 0.909$ ), B: Benign ( $\leq 0.446$ )

PROVEAN, -14~-2.5:Deleterious, -2.5~14:Neutral

SIFT, sorting intolerant from tolerant; sift $\geq 0.05$ , T, tolerated; sift < 0.05, D, deleterious

Mutation Taster, A: disease\_causing\_automatic, D: disease\_causing, N: polymorphism, P:polymorphism\_automatic
