# Supplementary material for: A Potential Therapy Using Antisense Oligonucleotides to Treat Autosomal Recessive Polycystic Kidney Disease
Source: MDPI journal article supplement (doi:10.3390/jcm12041428), 2023-02-10
Supplement: s1 [file s1]

**Table S1. Targeted Next-generation sequencing of 180 short related genes.**

|                |                |                |                 |                 |                |                |                 |                |                |
|----------------|----------------|----------------|-----------------|-----------------|----------------|----------------|-----------------|----------------|----------------|
| <i>AHI1</i>    | <i>ALG8</i>    | <i>ALMS1</i>   | <i>ANKS3</i>    | <i>ANKS6</i>    | <i>ARL13B</i>  | <i>ARL3</i>    | <i>ARL6</i>     | <i>ASS1</i>    | <i>ATXN10</i>  |
| <i>B9D1</i>    | <i>B9D2</i>    | <i>BBIP1</i>   | <i>BBS1</i>     | <i>BBS10</i>    | <i>BBS12</i>   | <i>BBS2</i>    | <i>BBS4</i>     | <i>BBS5</i>    | <i>BBS7</i>    |
| <i>BBS9</i>    | <i>C2CD3</i>   | <i>CC2D2A</i>  | <i>CCDC28B</i>  | <i>CCND1</i>    | <i>CELSR2</i>  | <i>CEP104</i>  | <i>CEP120</i>   | <i>CEP164</i>  | <i>CEP290</i>  |
| <i>CEP41</i>   | <i>CEP55</i>   | <i>CEP83</i>   | <i>CLUAP1</i>   | <i>Col4a1</i>   | <i>CPLANE1</i> | <i>CSPP1</i>   | <i>DCDC2</i>    | <i>DDX59</i>   | <i>DNAJB11</i> |
| <i>DYNC2H1</i> | <i>DYNC2I1</i> | <i>DYNC2I2</i> | <i>DYNC2LI1</i> | <i>DYNLT2B</i>  | <i>DZIP1L</i>  | <i>FAM111A</i> | <i>FAM149B1</i> | <i>FAM186B</i> | <i>GANAB</i>   |
| <i>GLI3</i>    | <i>GLIS2</i>   | <i>HNF1B</i>   | <i>HSPB11</i>   | <i>IFT122</i>   | <i>IFT140</i>  | <i>IFT172</i>  | <i>IFT20</i>    | <i>IFT22</i>   | <i>IFT27</i>   |
| <i>IFT43</i>   | <i>IFT52</i>   | <i>IFT57</i>   | <i>IFT74</i>    | <i>IFT80</i>    | <i>IFT81</i>   | <i>IFT88</i>   | <i>INCENP</i>   | <i>INPP5E</i>  | <i>INTU</i>    |
| <i>INVS</i>    | <i>IQCB1</i>   | <i>KATNIP</i>  | <i>KIAA0586</i> | <i>KIAA0753</i> | <i>KIF14</i>   | <i>KIF7</i>    | <i>LRP5</i>     | <i>LZTFL1</i>  | <i>MAPKBP1</i> |
| <i>MKKS</i>    | <i>MKS1</i>    | <i>MUC1</i>    | <i>NEK1</i>     | <i>NEK4</i>     | <i>NEK8</i>    | <i>NOTCH2</i>  | <i>NPHP1</i>    | <i>NPHP3</i>   | <i>NPHP4</i>   |
| <i>OFD1</i>    | <i>PDE6D</i>   | <i>PIAS1</i>   | <i>PIBF1</i>    | <i>PIFO</i>     | <i>PIK3R4</i>  | <i>PKD1</i>    | <i>PKD2</i>     | <i>PKHD1</i>   | <i>PMM2</i>    |
| <i>PRKCSH</i>  | <i>RBM48</i>   | <i>REN</i>     | <i>Robo2</i>    | <i>RPGRIP1L</i> | <i>RPS6KA2</i> | <i>SCLT1</i>   | <i>SDCCAG8</i>  | <i>SEC61A1</i> | <i>SEC61B</i>  |
| <i>SEC63</i>   | <i>SPAG17</i>  | <i>TBC1D32</i> | <i>TCTN1</i>    | <i>TCTN2</i>    | <i>TCTN3</i>   | <i>TMEM107</i> | <i>TMEM138</i>  | <i>TMEM17</i>  | <i>TMEM216</i> |
| <i>TMEM231</i> | <i>TMEM237</i> | <i>TMEM67</i>  | <i>TRAF3IP1</i> | <i>TRIM32</i>   | <i>TSC1</i>    | <i>TSC2</i>    | <i>TTBK2</i>    | <i>TTC21B</i>  | <i>TTC26</i>   |
| <i>TTC30B</i>  | <i>TTC8</i>    | <i>TXNDC15</i> | <i>UMOD</i>     | <i>VHL</i>      | <i>WDPCP</i>   | <i>WDR19</i>   | <i>WDR35</i>    | <i>XPNPEP3</i> | <i>ZNF423</i>  |
